Development 140, 479 (2013) doi:10.1242/dev.092486  
© 2013. Published by The Company of Biologists Ltd

## Macrophage migration inhibitory factor acts as a neurotrophin in the developing inner ear

**Lisa M. Bank, Lynne M. Bianchi, Fumi Ebisu, Dov Lerman-Sinkoff, Elizabeth C. Smiley, Yu-chi Shen, Poornapriya Ramamurthy, Deborah L. Thompson, Therese M. Roth, Christine R. Beck, Matthew Flynn, Ryan S. Teller, Luming Feng, G. Nicholas Llewellyn, Brandon Holmes, Cyrene Sharples, Jaeda Coutinho-Budd, Stephanie A. Linn, Andrew P. Chervenak, David F. Dolan, Jennifer Benson, Ariane Kanicki, Catherine A. Martin, Richard Altschuler, Alisa E. Koch, Ethan M. Jewett, John A. Germiller and Kate F. Barald**

There was an error published in *Development* **139**, 4666-4674.

The name of author Alisa E. Koch was spelled incorrectly. The corrected author list appears above.

The authors apologise to readers for this mistake.
